# Supplementary material for: Validation of Pharmacogenomic Interaction Probability (PIP) Scores in Predicting Drug–Gene, Drug–Drug–Gene, and Drug–Gene–Gene Interaction Risks in a Large Patient Population
Source: MDPI journal article supplement (doi:10.3390/jpm12121972), 2022-11-29
Supplement: s1 [file s1]

## Supplementary Material

**Table S1:** High-evidence drugs by clinical area

| Clinical Area     | Drug Name                | Clinical Area      | Drug Name                         |
|-------------------|--------------------------|--------------------|-----------------------------------|
| Behavioral Health | amitriptyline            | Infectious Disease | abacavir                          |
| Behavioral Health | amoxapine                | Infectious Disease | atazanavir                        |
| Behavioral Health | aripiprazole             | Infectious Disease | dolutegravir                      |
| Behavioral Health | aripiprazole<br>lauroxil | Infectious Disease | efavirenz                         |
| Behavioral Health | atomoxetine              | Infectious Disease | quinine                           |
| Behavioral Health | brexpiprazole            | Infectious Disease | sulfamethoxazole/<br>trimethoprim |
| Behavioral Health | citalopram               | Infectious Disease | voriconazole                      |
| Behavioral Health | clomipramine             | Miscellaneous      | cevimeline                        |
| Behavioral Health | clozapine                | Miscellaneous      | eliglustat                        |
| Behavioral Health | desipramine              | Neurology          | brivaracetam                      |
| Behavioral Health | diazepam                 | Neurology          | carbamazepine                     |
| Behavioral Health | doxepin                  | Neurology          | clobazam                          |
| Behavioral Health | duloxetine               | Neurology          | deutetrabenazine                  |
| Behavioral Health | escitalopram             | Neurology          | donepezil                         |

|                   |               |                 |               |
|-------------------|---------------|-----------------|---------------|
| Behavioral Health | fluvoxamine   | Neurology       | fosphenytoin  |
| Behavioral Health | iloperidone   | Neurology       | modafinil     |
| Behavioral Health | imipramine    | Neurology       | oxcarbazepine |
| Behavioral Health | lofexidine    | Neurology       | phenytoin     |
| Behavioral Health | nortriptyline | Neurology       | pimozide      |
| Behavioral Health | paroxetine    | Neurology       | pitolisant    |
| Behavioral Health | perphenazine  | Neurology       | siponimod     |
| Behavioral Health | protriptyline | Neurology       | tetrabenazine |
| Behavioral Health | risperidone   | Neurology       | valbenazine   |
| Behavioral Health | sertraline    | Pain Management | carisoprodol  |
| Behavioral Health | thioridazine  | Pain Management | celecoxib     |
| Behavioral Health | trimipramine  | Pain Management | codeine       |
| Behavioral Health | venlafaxine   | Pain Management | flurbiprofen  |
| Behavioral Health | vortioxetine  | Pain Management | hydrocodone   |
| Cardiology        | atorvastatin  | Pain Management | ibuprofen     |
| Cardiology        | carvedilol    | Pain Management | meloxicam     |
| Cardiology        | clopidogrel   | Pain Management | methadone     |
| Cardiology        | fluvastatin   | Pain Management | oliceridine   |

|                  |                 |                                |               |
|------------------|-----------------|--------------------------------|---------------|
| Cardiology       | hydralazine     | Pain Management                | piroxicam     |
| Cardiology       | lovastatin      | Pain Management                | tramadol      |
| Cardiology       | pitavastatin    | Reproductive and Sexual Health | flibanserin   |
| Cardiology       | pravastatin     | Rheumatology                   | allopurinol   |
| Cardiology       | propafenone     | Rheumatology                   | amifampridine |
| Cardiology       | rosuvastatin    | Rheumatology                   | azathioprine  |
| Cardiology       | simvastatin     | Transplant                     | tacrolimus    |
| Cardiology       | warfarin        | Urology                        | darifenacin   |
| Endocrinology    | elagolix        | Urology                        | fesoterodine  |
| Gastroenterology | dexlansoprazole | Urology                        | mirabegron    |
| Gastroenterology | dronabinol      | Urology                        | tamsulosin    |
| Gastroenterology | esomeprazole    | Urology                        | tolterodine   |
| Gastroenterology | lansoprazole    |                                |               |
| Gastroenterology | meclizine       |                                |               |
| Gastroenterology | metoclopramide  |                                |               |
| Gastroenterology | omeprazole      |                                |               |
| Gastroenterology | ondansetron     |                                |               |
| Gastroenterology | pantoprazole    |                                |               |

|                     |                            |  |  |
|---------------------|----------------------------|--|--|
| Gastroenterology    | rabeprazole                |  |  |
| Gastroenterology    | sulfasalazine              |  |  |
| Hematology/Oncology | belinostat                 |  |  |
| Hematology/Oncology | capecitabine               |  |  |
| Hematology/Oncology | eltrombopag                |  |  |
| Hematology/Oncology | erdafitinib                |  |  |
| Hematology/Oncology | fluorouracil               |  |  |
| Hematology/Oncology | fluorouracil<br>topical    |  |  |
| Hematology/Oncology | gefitinib                  |  |  |
| Hematology/Oncology | irinotecan                 |  |  |
| Hematology/Oncology | mercaptopurine             |  |  |
| Hematology/Oncology | nilotinib                  |  |  |
| Hematology/Oncology | pazopanib                  |  |  |
| Hematology/Oncology | sacituzumab govitecan-hziy |  |  |
| Hematology/Oncology | tamoxifen                  |  |  |
| Hematology/Oncology | thioguanine                |  |  |
| Hematology/Oncology | avatrombopag               |  |  |
